# Supplementary material
Source: PubMed Central journal article supplement (PMC4274806)

SUPPLEMENTARY DATA

**Supplementary Figure 1.** A) SIRT1 and DBC1 expression in inguinal fat tissue in young (8 weeks) and old (12 months) mice. B) Protection against liver steatosis in DBC1 KO mice fed with high-fat diet for 12 weeks. H&E staining. Magnification 100X.

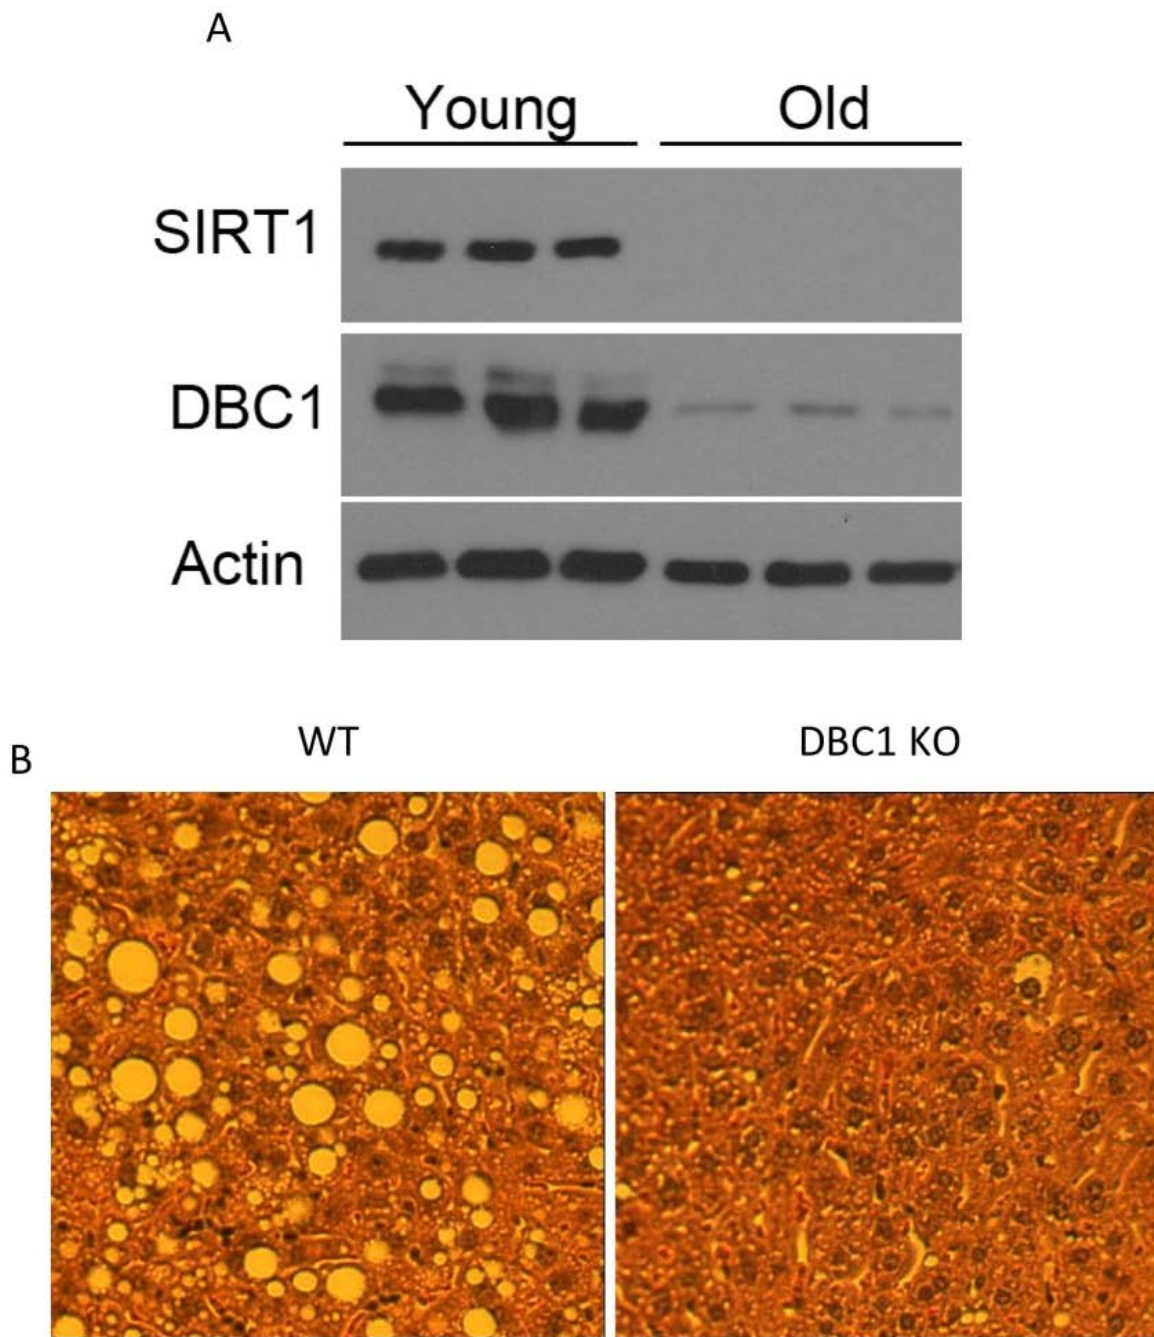

SUPPLEMENTARY DATA

**Supplementary Figure 2.** DBC1 deletion preserves insulin sensitivity in skeletal muscle. A) AKT phosphorylation in skeletal muscle from WT mice fed with normal and high-fat diet compared with DBC1 KO mice fed with high-fat diet. 20 week old mice were fed for 5 weeks with a high-fat diet. B) AKT phosphorylation in 25 weeks old ApoE<sup>-/-</sup> DBC1<sup>+/+</sup> and ApoE<sup>-/-</sup> DBC1<sup>-/-</sup> mice after 5 weeks of feeding with a high-fat diet.

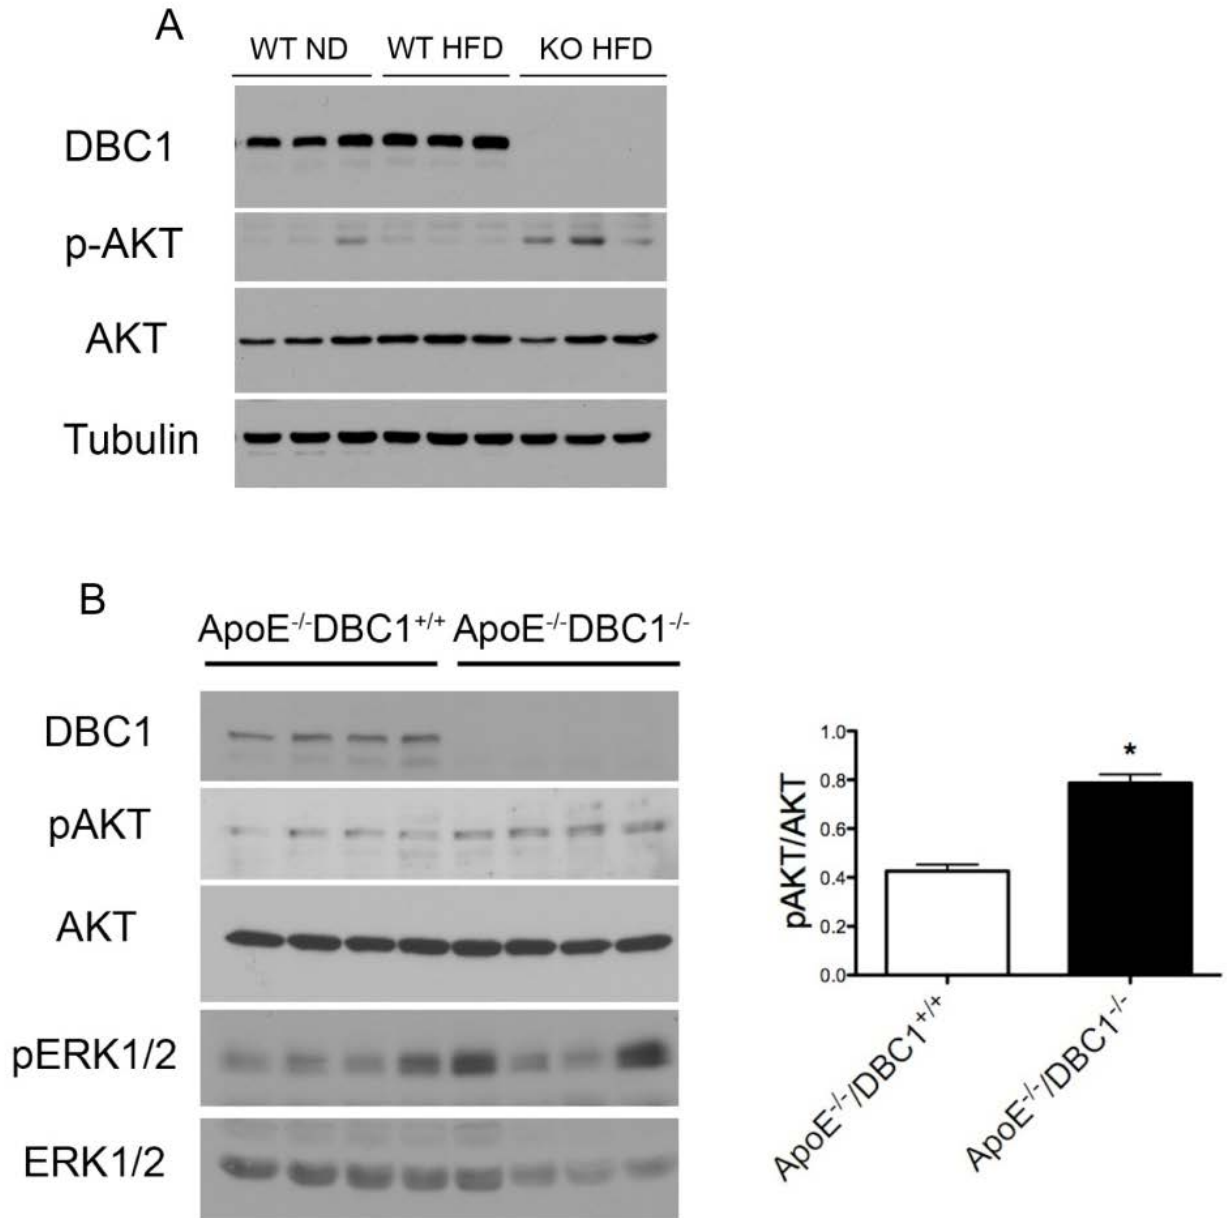

SUPPLEMENTARY DATA

**Supplementary Figure 3.** Energy expenditure was measured ApoE<sup>-/-</sup>/DBC1<sup>+/+</sup> and ApoE<sup>-/-</sup>/DBC1<sup>-/-</sup> mice over a 24 hours period after 20 weeks of feeding with a high-fat diet (n = 8 per group).

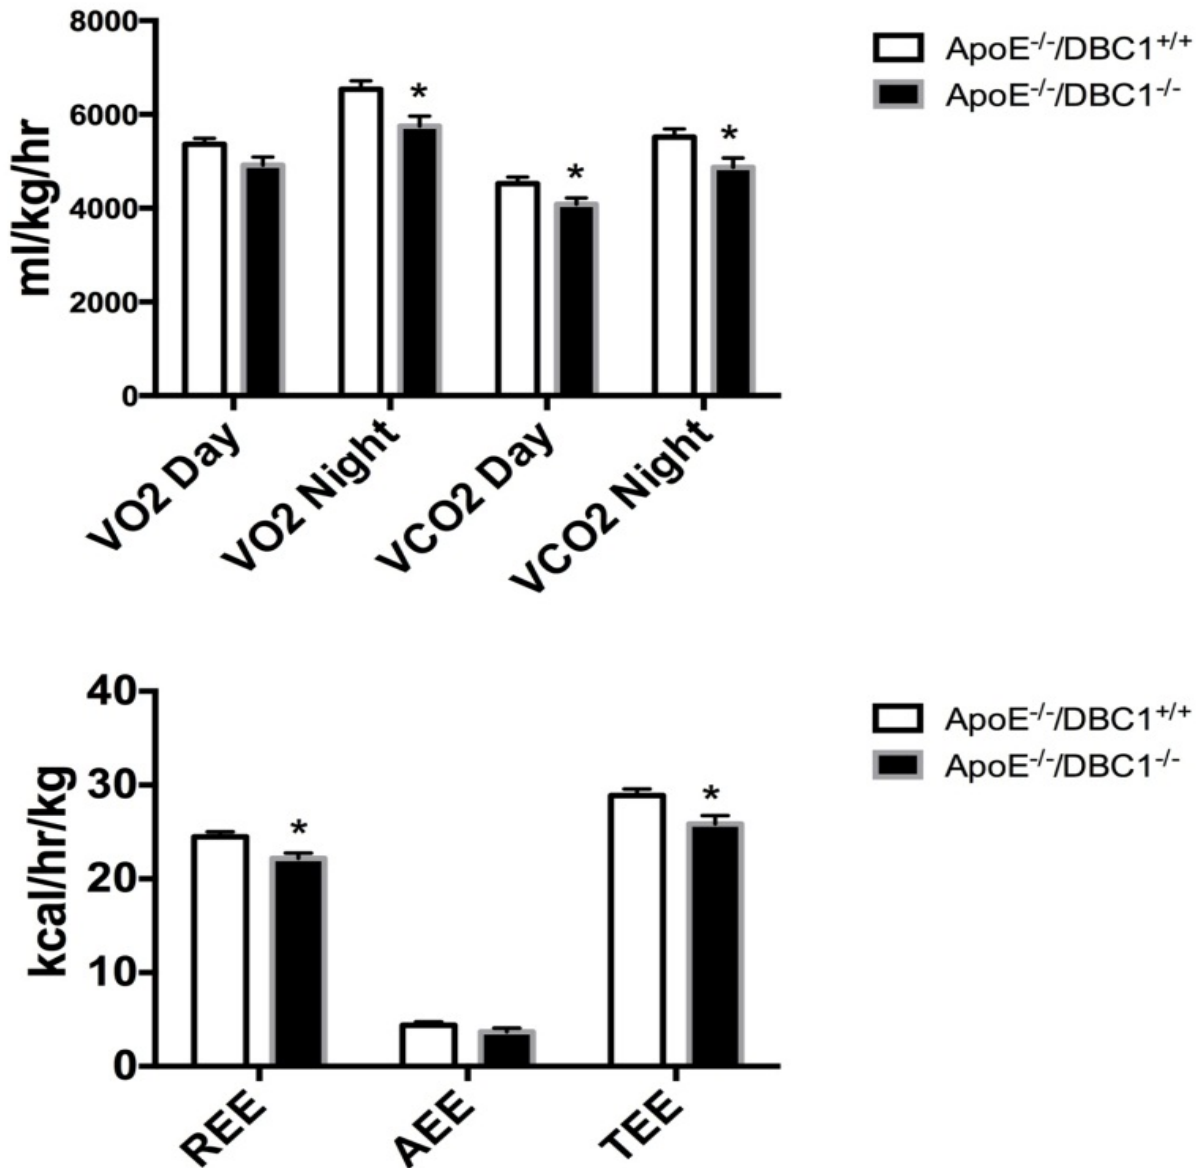

Supplement: supp_db14-0192_DB140192SupplementaryData.pdf [file supp_db14-0192_DB140192SupplementaryData.pdf]
